# Supplementary material
Source: PubMed Central journal article supplement (PMC5035918)
Supplement: Supp_Figure1.pdf [file Supp_Figure1.pdf]

## Supplementary Data

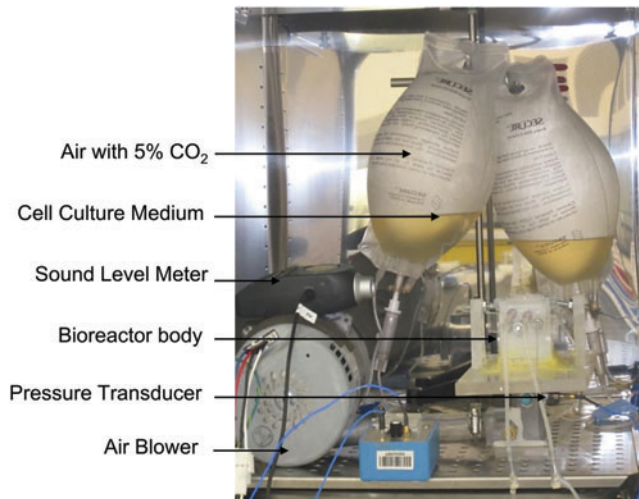

**SUPPLEMENTARY FIG. S1.** Picture of the bioreactor system during phonation. The bioreactor system consists of the bioreactor body mounted on a Plexiglas base connected to an air blower, a pressure transducer, and a sound level meter, which are housed in a tissue culture incubator. The commercial incubator was used to maintain a temperature of 37°C and a relative humidity of around 95%.
