# Supplementary material
Source: PubMed Central journal article supplement (PMC5035918)
Supplement: Supp_Figure2.pdf [file Supp_Figure2.pdf]

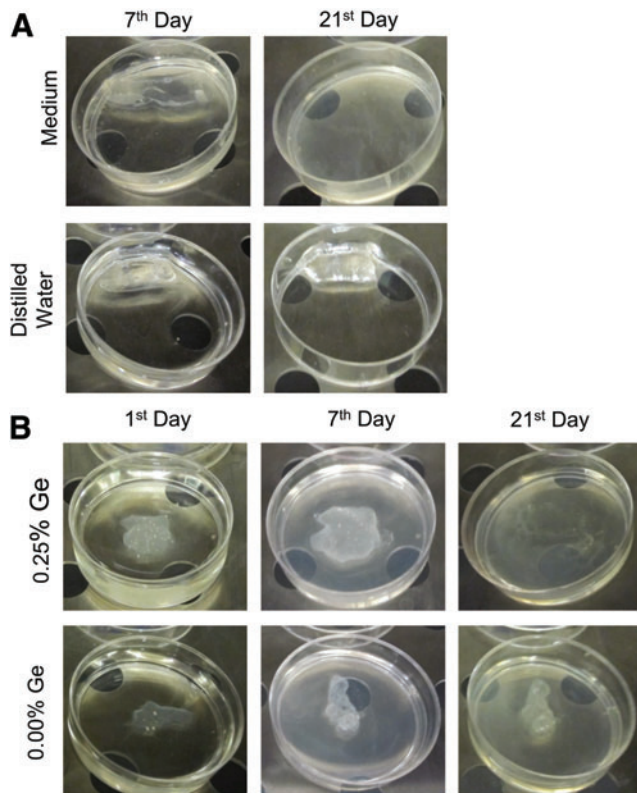

**SUPPLEMENTARY FIG. S2.** (A) The HA-Ge hydrogels (0.50% HA, 0.25% Ge, 0.50% PEGTA) submerged in cell culture medium with 10% FBS (*first row*), and in distilled water (*second row*). (B) The HA-Ge hydrogels (0.50% HA, 0.50% PEGTA) with two different Ge concentrations (0.00% and 0.25%) submerged in cell culture medium with 10% FBS over a 21-day period. FBS, fetal bovine serum; Ge, gelatin; HA, hyaluronic acid; PEGTA, polyethylene glycol tetra-acrylate.
