# Supplementary material
Source: PubMed Central journal article supplement (PMC5035918)
Supplement: Supp_Figure3.pdf [file Supp_Figure3.pdf]

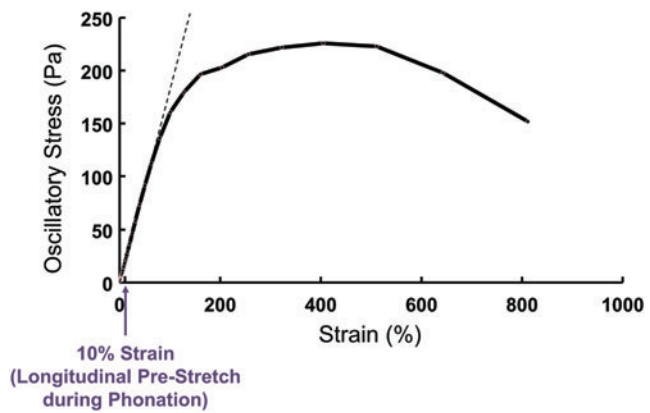

**SUPPLEMENTARY FIG. S3.** Plot of nominal stress versus strain for a sample of the HA-Ge hydrogel (0.50% HA, 0.10% Ge, 0.50% PEGTA). The hydrogel is linearly elastic over a wide range of strains (1–80%).
