# Supplementary material
Source: PubMed Central journal article supplement (PMC5035918)
Supplement: Supp_Table1.pdf [file Supp_Table1.pdf]

SUPPLEMENTARY TABLE S1. THE OGDEN MODEL CONSTANTS USED IN THE COMPUTATIONAL MODEL

| <i>Layer</i>          | $\mu_1$ | $\mu_2$ | $\mu_3$ | $\mu_4$ | $\mu_5$ | $\mu_6$ |
|-----------------------|---------|---------|---------|---------|---------|---------|
| Outer layer           | -97.38  | -11.39  | 59.08   | 35.07   | -51.01  | 13.26   |
| Main layer            | -30.42  | -3.557  | 18.46   | 10.96   | -15.93  | 4.142   |
| Cell-scaffold mixture | -1.848  | -0.2161 | 1.121   | 0.6656  | -0.9681 | 0.2516  |

For each layer,  $\alpha_1=1$ ,  $\alpha_2=2$ ,  $\alpha_3=3$ ,  $\alpha_4=4$ ,  $\alpha_5=5$ , and  $\alpha_6=6$ .
